# Supplementary material for: Prevalence of serum IgG antibodies against SARS-CoV-2 among clinic staff
Source: PubMed Central journal article supplement (PMC7316280; doi:10.1371/journal.pone.0235417), 2020-06-25
Supplement: pone.0235417.s001.pdf [file pone.0235417.s001.pdf]

# S1: Used questionnaire for the study participants.

## Original language version (German)

Pilotstudie zur Prävalenz der Immunität gegen SARS-CoV-2 im medizinischen Personal einer Klinik

### **Altersgruppe:**

- Kinder und Jugendliche zwischen sechs und 17 Jahren,
- Erwachsene zwischen 18 und 29 Jahren,
- Erwachsene zwischen 30 und 49 Jahren,
- Erwachsene zwischen 50 und 64 Jahren,
- Erwachsene im Alter von 65 Jahren und älter

### **Geschlecht:**

- männlich
- weiblich
- divers

### **Berufsgruppe**

- Pflegedienst
- Arzt
- Therapeut
- andere Berufsgruppe (z. B. Verwaltung)

### **Haben Sie im Jahr 2020 Infekte durchgemacht?**

**Nein**, ich war in den letzten Monaten (Januar bis jetzt) überhaupt nicht krank.

**Ja**, ich habe folgende Infekte durchgemacht:

|                                         |  |  |  |  |
|-----------------------------------------|--|--|--|--|
| Datum der Infekte                       |  |  |  |  |
| Dauer der Krankheit (Tage)              |  |  |  |  |
| Symptome (bitte ankreuzen):             |  |  |  |  |
| Fieber (wenn ja: wie hoch in °C)        |  |  |  |  |
| Husten                                  |  |  |  |  |
| Atemnot                                 |  |  |  |  |
| Muskel-/ Gelenkschmerzen                |  |  |  |  |
| Halsschmerzen                           |  |  |  |  |
| Kopfschmerzen                           |  |  |  |  |
| Übelkeit/Erbrechen                      |  |  |  |  |
| Verstopfte Nase                         |  |  |  |  |
| Durchfall                               |  |  |  |  |
| Andere Beschwerden (bitte aufschreiben) |  |  |  |  |

S1: Used questionnaire for the study participants.

**Bei mir liegen folgende Vorerkrankungen vor (bitte ankreuzen, wenn vorliegend):**

- Herz-Kreislauf-System (z. B. koronare Herzerkrankung, Bluthochdruck): .....
- .....
- Lunge (z. B. Asthma, chronische Bronchitis): .....
- chronische Lebererkrankungen: .....
- Diabetes mellitus
- Krebserkrankung
- geschwächtes Immunsystem (z. B. aufgrund einer Erkrankung, die mit einer Immunschwäche einhergeht oder durch Einnahme von Medikamenten, die die Immunabwehr schwächen, wie z. B. Cortison): .....
- .....

**Haben Sie in den vergangenen drei Monaten Auslandsaufenthalte gehabt?**

- nein
- ja: vom (Datum) ..... bis .....
- in .....

**Für Frauen: Sind Sie schwanger?**

- ja, ..... Woche (SSW)
- nein

# S1: Used questionnaire for the study participants.

## English version

Pilot study of the prevalence of serum IgG antibodies against SARS-CoV-2 among clinic staff

### Age group:

- Children and teenager between six and 17 years,
- Adults between 18 and 29 years,
- Adults between 30 and 49 years,
- Adults between 50 and 64 years,
- Adults of 65 years and older.

### Gender:

- male
- female
- divers

### Professional group nurse

- physician
- therapist
- others (i.e. administration)

### Did you go through infections in 2020?

**No**, I did not feel sick between first of January until now.

**Yes**, I went through the following infections:

|                                         |  |  |  |  |
|-----------------------------------------|--|--|--|--|
| Date of infection:                      |  |  |  |  |
| Duration illness (days)                 |  |  |  |  |
| Symptom<br>(please tick off):           |  |  |  |  |
| Fever (if yes, which temperature in °C) |  |  |  |  |
| Coughing                                |  |  |  |  |
| Respiratory disstress                   |  |  |  |  |
| Muscle/joint pain                       |  |  |  |  |
| Sore throat                             |  |  |  |  |
| Headaches                               |  |  |  |  |
| Nausea/vomiting                         |  |  |  |  |
| Rhinitis                                |  |  |  |  |
| Diarrhea                                |  |  |  |  |
| Other complaints (please notice)        |  |  |  |  |

S1: Used questionnaire for the study participants.

**I have the following pre-existing conditions (please tick off if present):**

- Cardiovascular system (i. e. coronary heart disease, high blood pressure): .....
- .....
- Respiratory system (i. e. Asthma, chronic bronchitis): .....
- Chronic liver diseases: .....
- Diabetes mellitus
- Cancer
- Weakened immune system (i. e. due to a condition that is associated with an immune deficiency or by taking drugs that weaken the immune system, such as cortisone): .....
- .....

**Have you been abroad in the past three months?**

- No
- Yes: from (Date) ..... to .....
- in .....

**For women: Are you pregnant?**

- Yes, .... (week of pregnancy)
- No
